# Supplementary material for: Single gold-nanoparticles-decorated silver/carbon nanowires as substrates for surface-enhanced Raman scattering detection
Source: Royal Society of Chemistry journal article supplement (doi:10.1039/c3ra45397a), 2013-01-01
Supplement: c3ra45397a.pdf [file c3ra45397a.pdf]

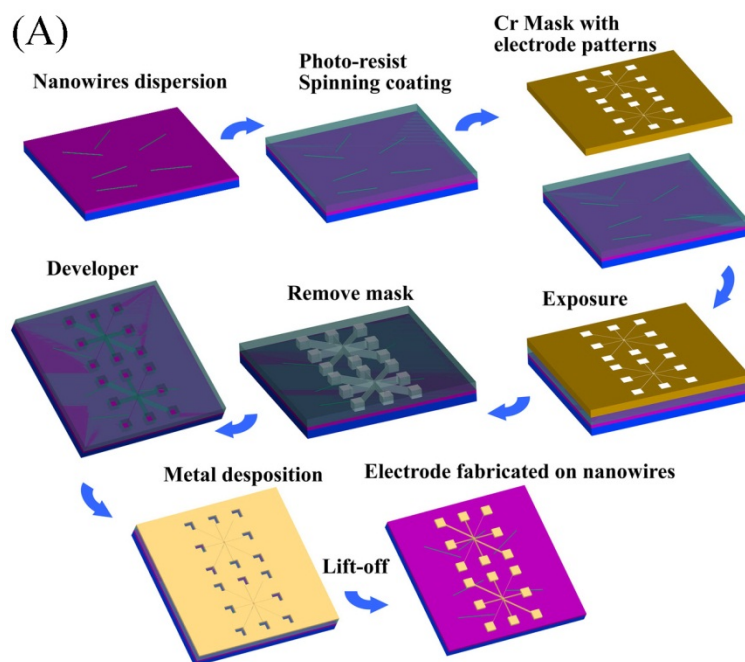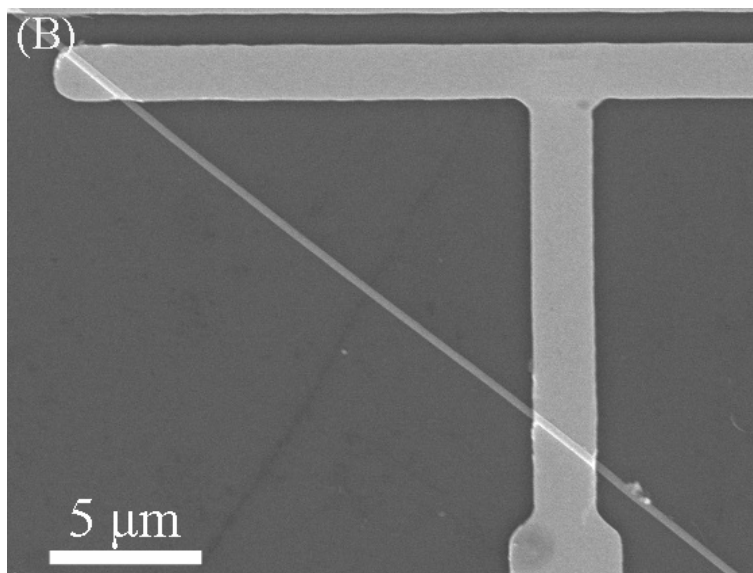

Figure S1 (A) Schematic illustration of the process for fixing the nanowires on silica substrate; (B) SEM image of a single Ag/C/AuNPs nanowire fixed on silica substrate by the electrodes.



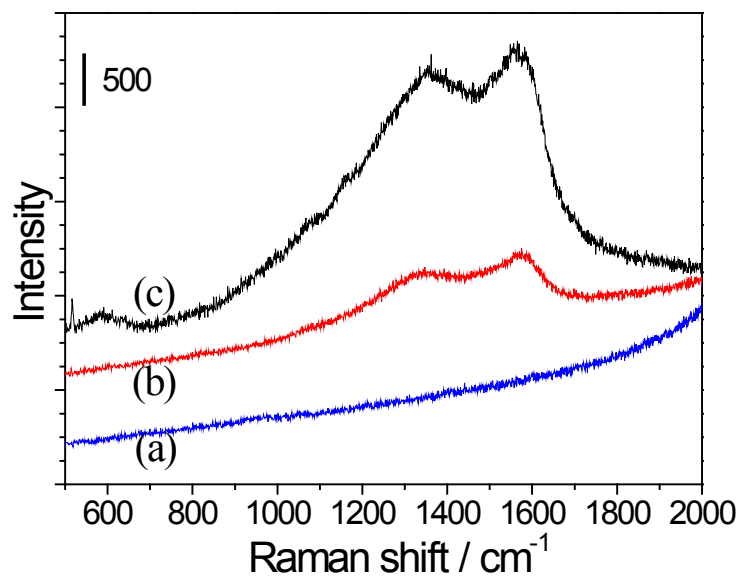

Figure S2 Raman spectra of Ag/C nanowires prepared with different amount of glucose: (a) 0.05 g, (b) 0.1 g, and (c) 0.5 g.

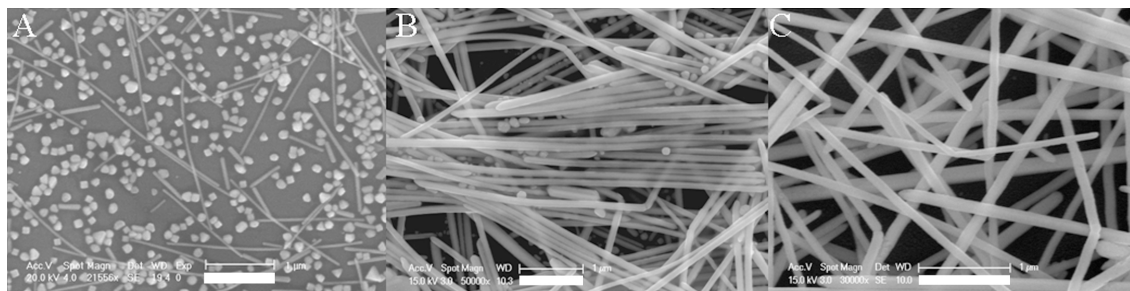

Figure S3 SEM images of Ag/C nanowires synthesized with different amount of PVP: (A) 0.03 g, (B) 0.1 g, and (C) 0.2 g.

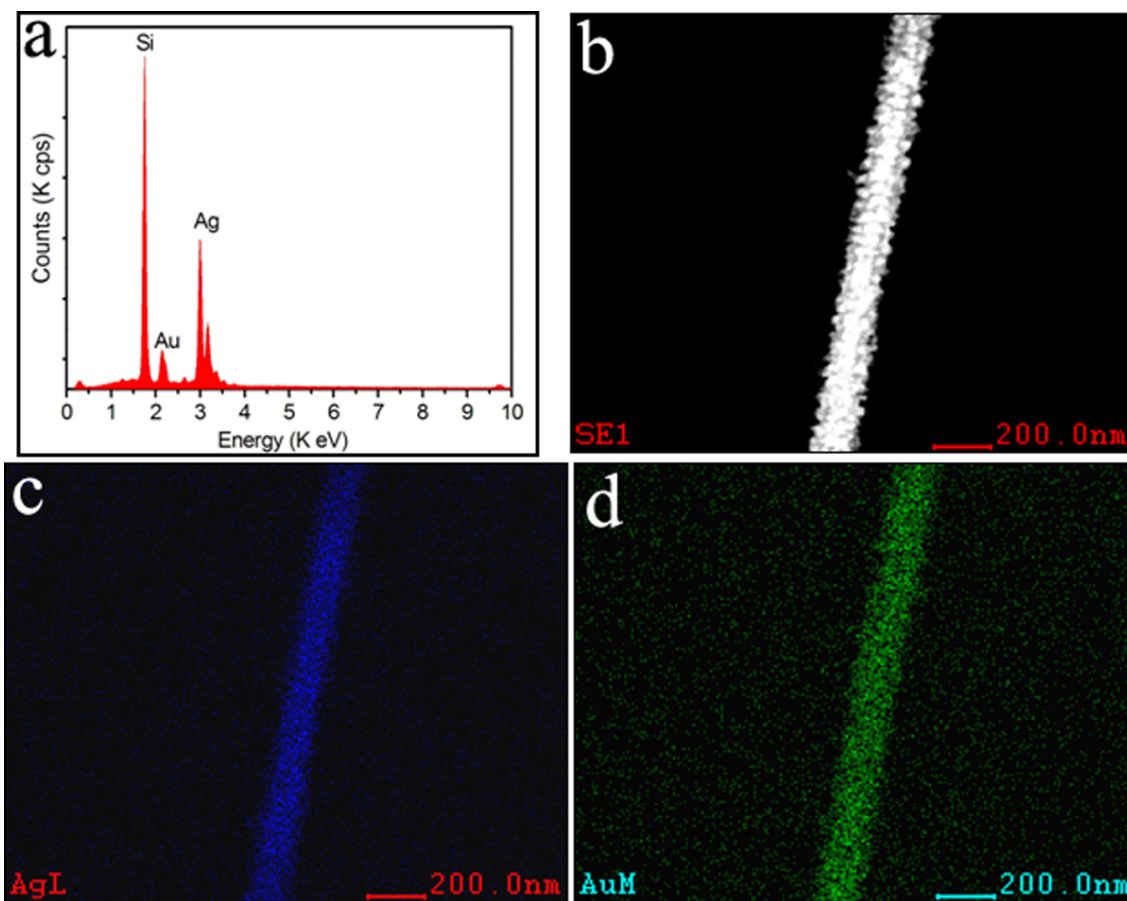

Figure S4 (a) EDX spectrum, (b) SEM image, (c, d) EDX elemental mapping images of Ag/C/AuNPs nanowires. Blue and green in (c) and (d) indicate the presence of Ag and Au, respectively.

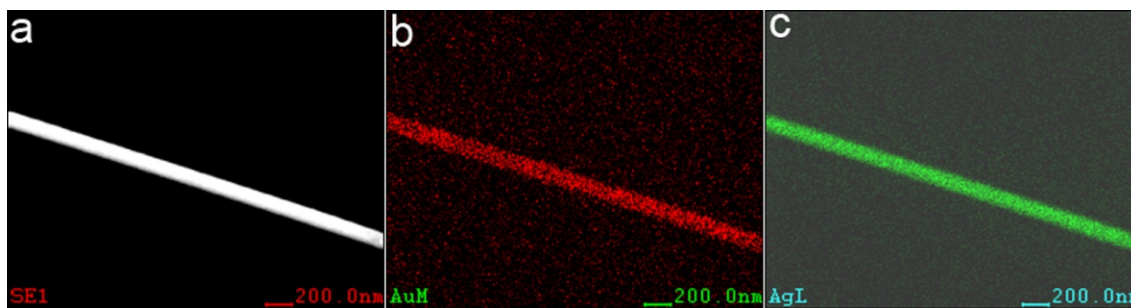

Figure S5 (a) SEM image and (b, c) EDX elemental mapping images of single Ag/AuNPs nanowires. Red and green, respectively, indicate the presence of Au and Ag.

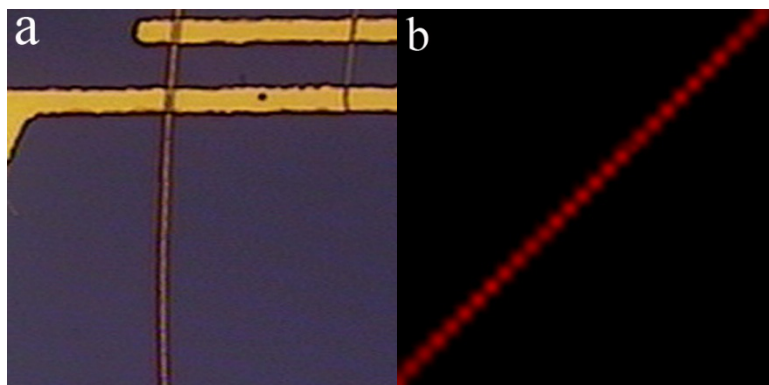

Figure S6 (a) Optical microscope image of single Ag/C/AuNPs nanowire fixed on the substrate by the electrode. (b) SERS mapping of R6G adsorbed on single Ag/C/AuNPs nanowire.

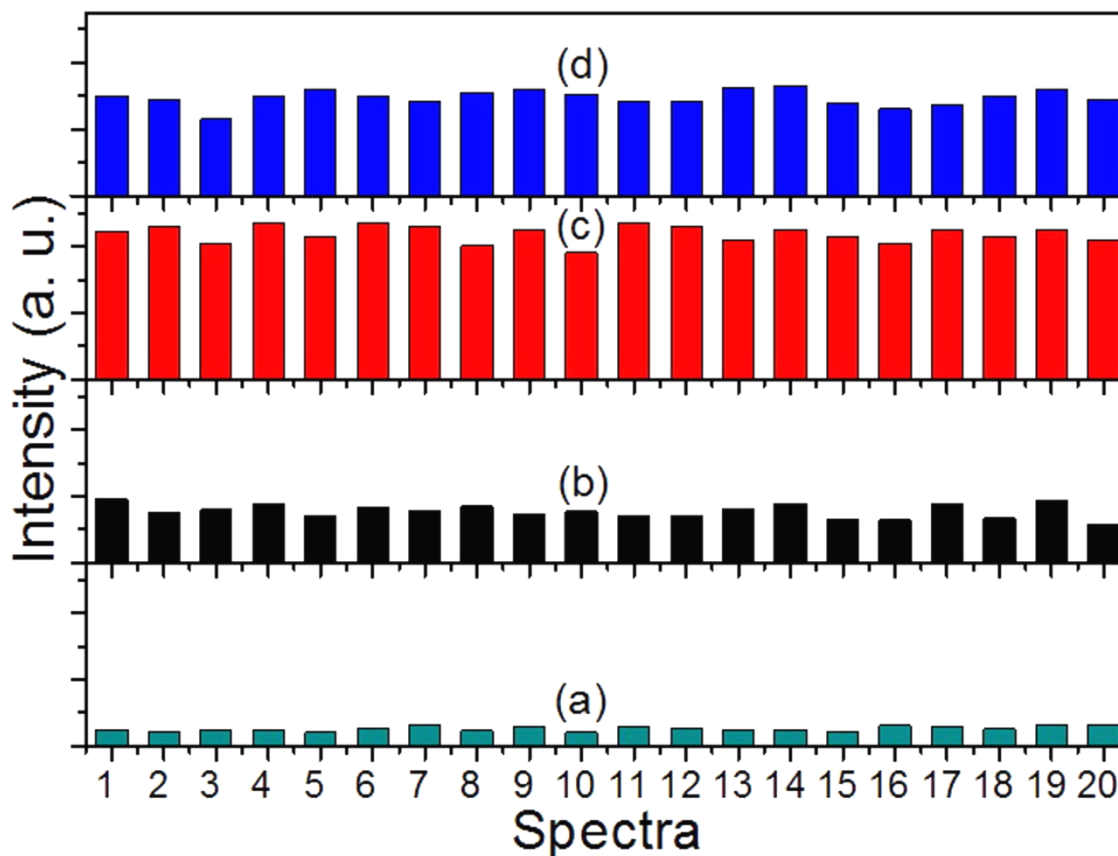

Figure S7 Peak height of the  $1510\text{ cm}^{-1}$  line for 20 SERS spectra of R6G ( $1 \times 10^{-7}\text{ M}$ ) measured from 20 different single Ag/C/AuNPs nanowires: (a) Ag/AuNPs, (b, c, d) Ag/C/AuNPs nanowires prepared with different volumes of  $\text{Au}^{3+}$  solutions: (b) 2.0 mL, (c) 5.0 mL, (d) 8.0 mL.
